# Supplementary material
Source: Springer Nature journal article supplement (https://www.springermedizin.de/resource/supplementary/12967_2013_1651_MOESM9_ESM.pdf/9574552)

**A. Fat only**

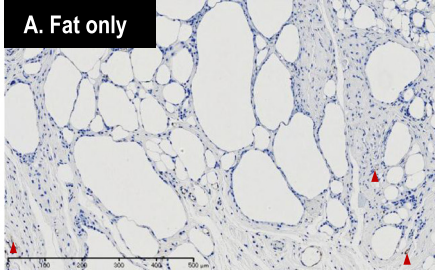

**B. Fat + ADRC (×1)**

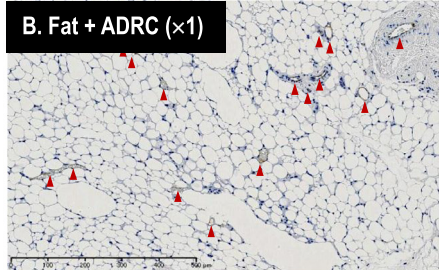

**C. Fat + ADRC (×5)**

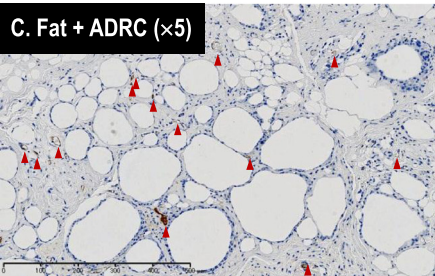

**D. Fat + ADRC (×10)**

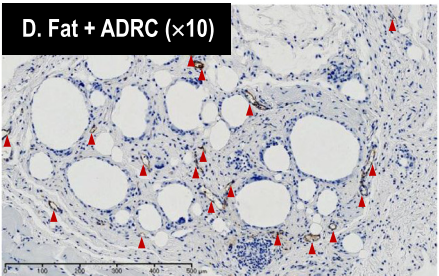

Supplement: MOESM9 [file 9574552]
